# Supplementary material for: The origin of the hysteresis in cyclic voltammetric response of alkaline methanol electrooxidation
Source: Royal Society of Chemistry journal article supplement (doi:10.1039/d0cp00976h), 2020-01-01
Supplement: d0cp00976h1.pdf [file d0cp00976h1.pdf]

1 **Electronic Supplementary Information**

2 **The origin of the hysteresis in cyclic voltammetric response of alka-line methanol**  
3 **electrooxidation**

4 **Theresa Haisch, Fabian Kubannek, Lialia Nikitina, Igor Niktin, Sabine Pott, Tanja Clees and Ulrike Krewer**

5 **Corresponding author: Ulrike Krewer**

6 **E-mail: [ulrike.krewer@kit.edu](mailto:ulrike.krewer@kit.edu)**

7 **This PDF file includes:**

8 Figs. S1 to S2

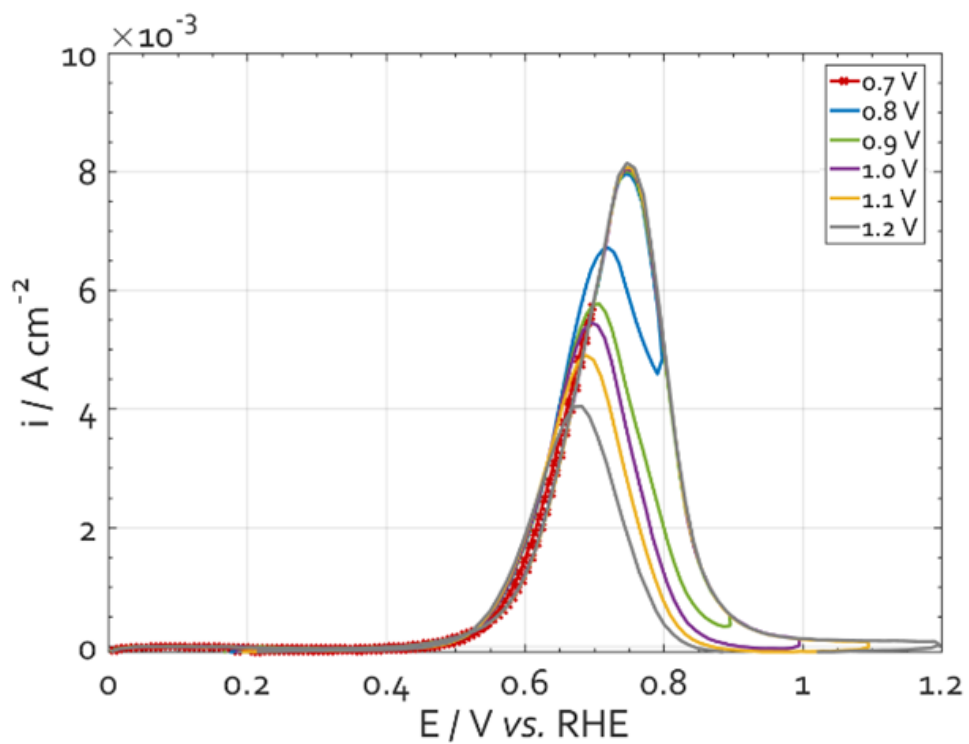

Fig. S1. Experimental cyclic voltammograms of a 0.5 M NaOH + 0.5 M MeOH solution on a Pt-RDE with different upper potential limits: 0.7 (red), 0.8 (blue), 0.9 (green), 1.0 (purple), 1.1 (yellow) and 1.2 V (grey). Scan rate  $100 \text{ mV s}^{-1}$ .

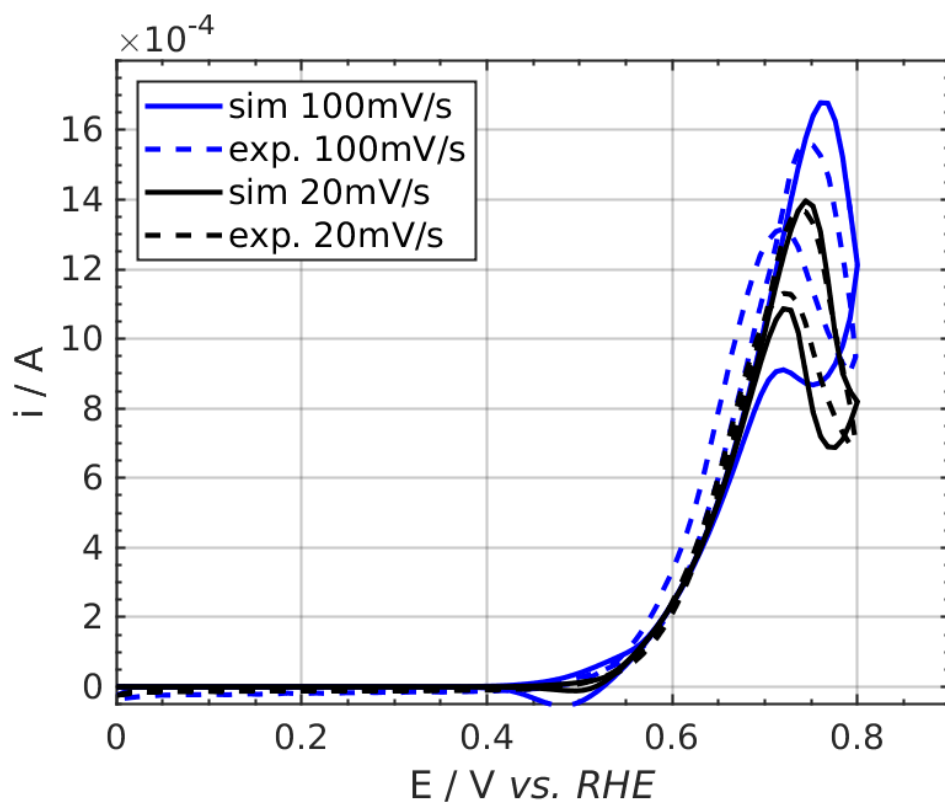

Fig. S2. Experimental and simulated CV curves of an alkaline methanol solution (0.5 M) on Pt with an upper potential limit of 0.8 V at room temperature (scan rate: 20 mV s<sup>-1</sup> and 100 mV s<sup>-1</sup>).
